# Supplementary material for: Preparation of trans-Crocetin with High Solubility, Stability, and Oral Bioavailability by Incorporation into Three Types of Cyclodextrins
Source: MDPI journal article supplement (doi:10.3390/pharmaceutics15122790), 2023-12-16
Supplement: s1 [file s1]

## Supporting Information

### **Preparation of *trans*-Crocetin with High Solubility, Stability, and Oral Bioavailability by Incorporation into Three Types of Cyclodextrins**

Nan Liu<sup>1 †</sup>, Jie Xiao<sup>2 †</sup>, Ling-He Zang<sup>3</sup>, Peng Quan<sup>1</sup>, Dong-Chun Liu<sup>2\*</sup>

<sup>1</sup>School of Pharmacy, Shenyang Pharmaceutical University 110016 Shenyang, Liaoning Province, China

<sup>2</sup>School of Chinese Materia Medica, Shenyang Pharmaceutical University 110016 Shenyang, Liaoning Province, China

<sup>3</sup>School of Life Science and Biopharmaceutics, Shenyang Pharmaceutical University 110016 Shenyang, Liaoning Province, China

\*Corresponding author: Dong-Chun Liu (liudc@syphu.edu.cn)

Table S1 Drug encapsulation efficiency of each CRT/CD inclusion complexes.

| NO.     | EE (%)               |                        |                      |
|---------|----------------------|------------------------|----------------------|
|         | CRT/ $\alpha$ -CD IC | CRT/HP- $\beta$ -CD IC | CRT/ $\gamma$ -CD IC |
| 1       | 88.84                | 89.34                  | 92.37                |
| 2       | 89.80                | 89.99                  | 91.41                |
| 3       | 88.96                | 90.47                  | 91.93                |
| Mean    | 89.20 $\pm$ 0.43     | 89.93 $\pm$ 0.57       | 91.90 $\pm$ 0.39     |
| RSD (%) | 0.59%                | 0.63%                  | 0.52%                |

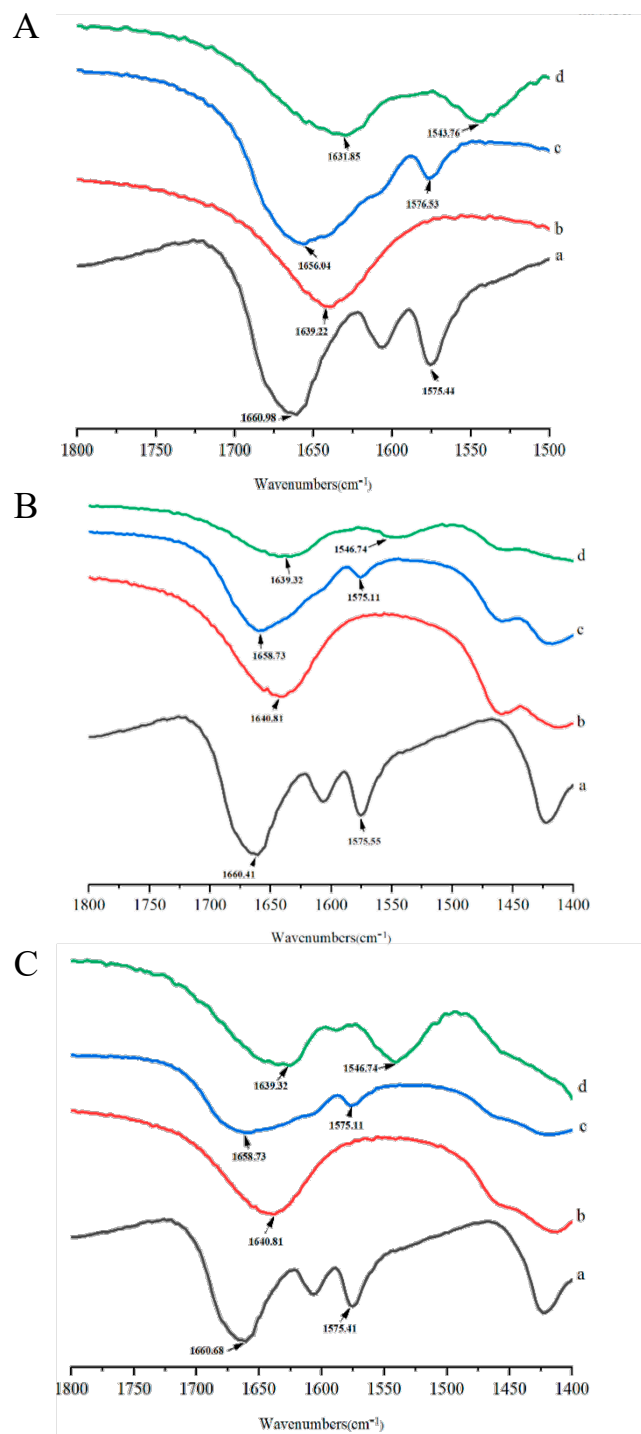

**Figure S1.** FT-IR spectra of (a) CRT, (b) CD, (c) PM, and (d) IC in CRT/ $\alpha$ -CD system (**A**), CRT/HP- $\beta$ -CD system (**B**), and CRT/ $\gamma$ -CD system (**C**) from 1800-1400  $\text{cm}^{-1}$ .

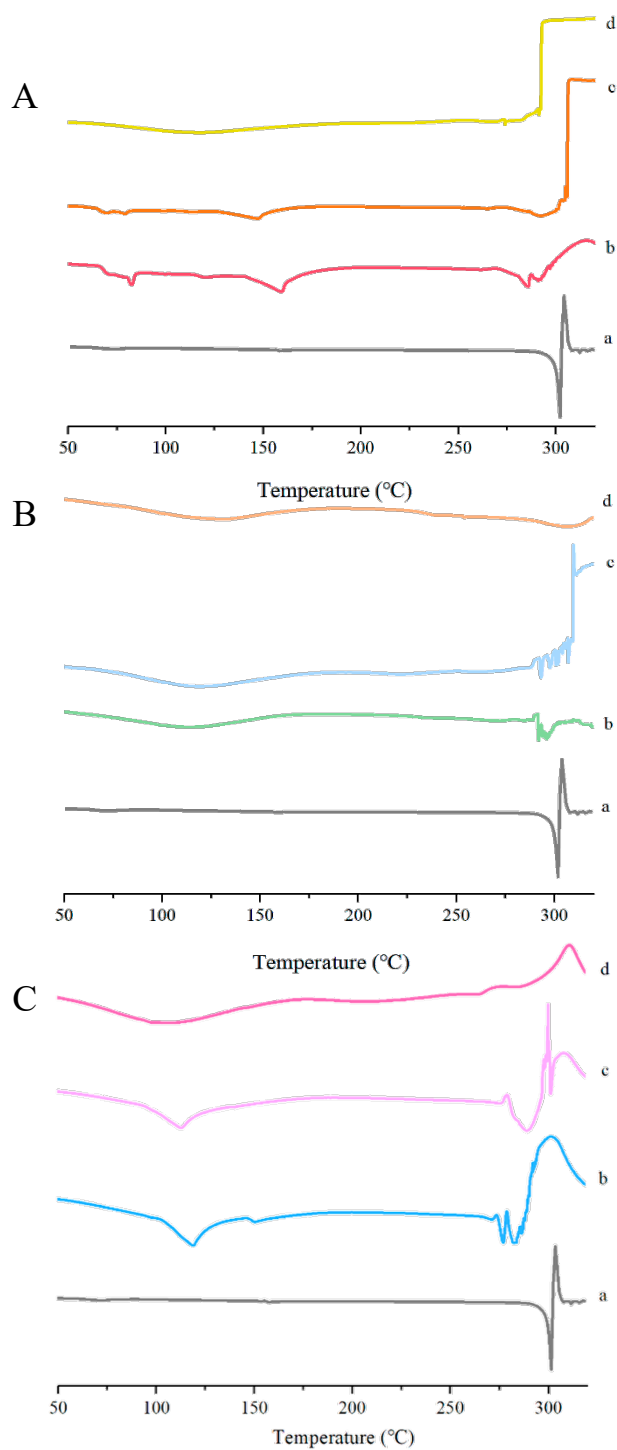

**Figure S2.** DSC curves of (a) CRT, (b) CD, (c) PM, and (d) IC in CRT/ $\alpha$ -CD system (A), CRT/HP- $\beta$ -CD system (B), and CRT/ $\gamma$ -CD system (C), respectively.

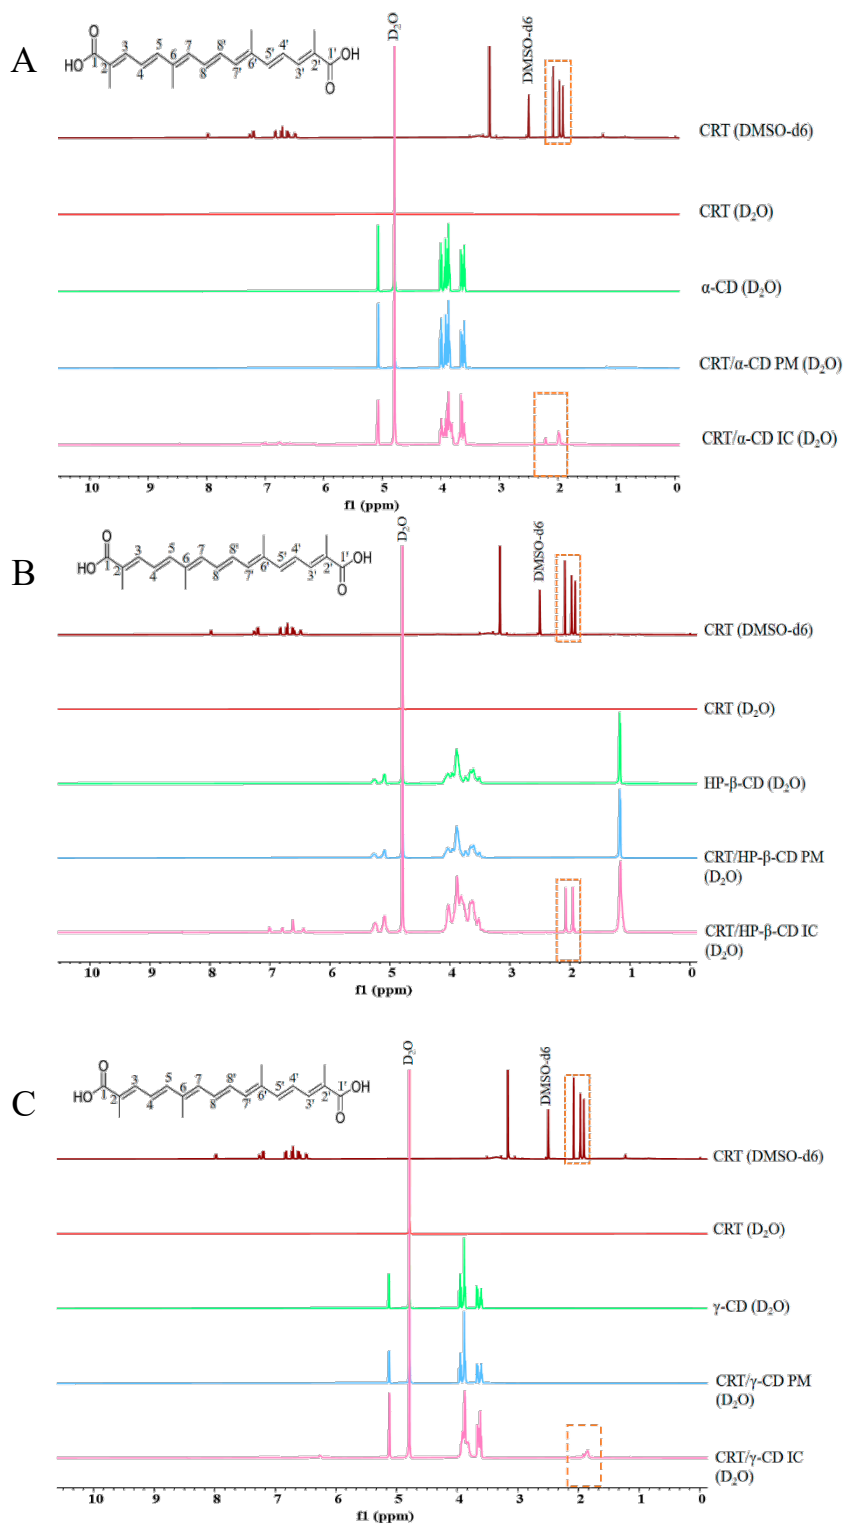

**Figure S3.**  $^1\text{H}$  NMR spectra of CRT (DMSO- $d_6$ ), CRT ( $\text{D}_2\text{O}$ ), CD ( $\text{D}_2\text{O}$ ), PM ( $\text{D}_2\text{O}$ ), and IC ( $\text{D}_2\text{O}$ ) in CRT/ $\alpha$ -CD system (A), CRT/HP- $\beta$ -CD system (B), and CRT/ $\gamma$ -CD system (C) from 0-10 ppm.

Table S2 Thermodynamic parameters of three inclusion complexes.

| CD              | T (°C) | Equation                | $\Delta G$ (KJ) | Ks (L·mol <sup>-1</sup> ) |
|-----------------|--------|-------------------------|-----------------|---------------------------|
| $\alpha$ -CD    | 37     | $Y=0.007x+0.22*10^{-5}$ | -20.67          | 3027.39                   |
| HP- $\beta$ -CD | 37     | $Y=0.017x-0.22*10^{-5}$ | -23.15          | 7912.04                   |
| $\gamma$ -CD    | 37     | $Y=0.001x+0.22*10^{-5}$ | -15.62          | 427.45                    |

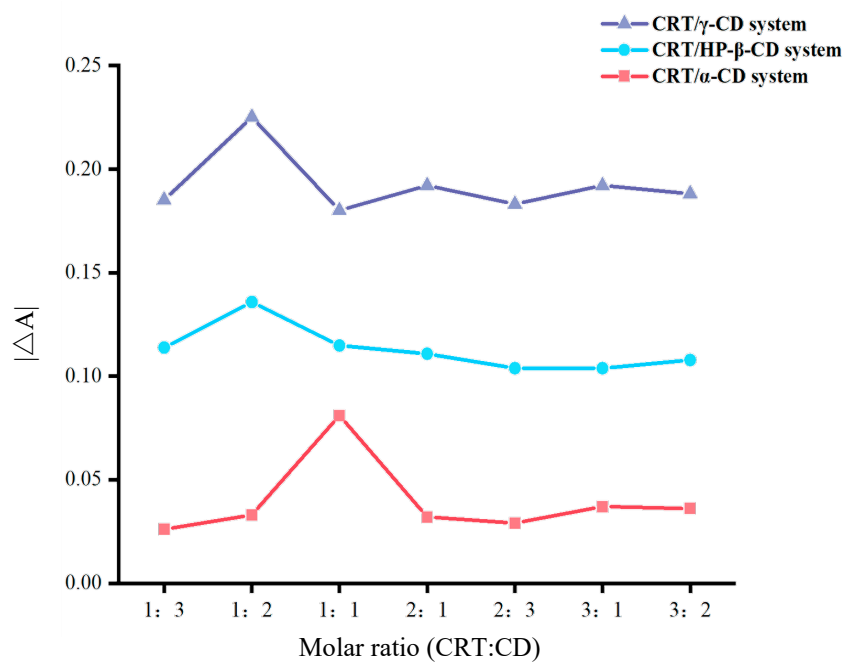

**Figure S4.** Molar ratio experiments of (■) CRT/ $\alpha$ -CD IC, (●) CRT/HP- $\beta$ -CD IC, and (▲) CRT/ $\gamma$ -CD IC by continuous variation method.

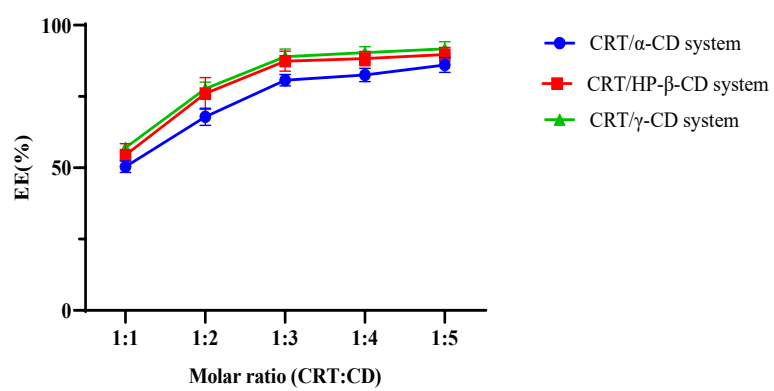

**Figure S5.** Effects of molar ratio time on encapsulation efficiency ( $n = 3$ , mean  $\pm$  S.D.).
